# Supplementary material
Source: Springer Nature journal article supplement (https://www.springermedizin.de/resource/supplementary/12935_2011_322_MOESM5_ESM.pdf/9540288)

**A****Treated with Ad/CMV -GFP**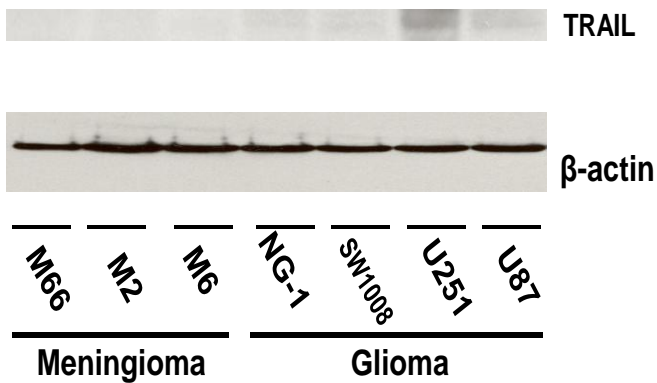**B****Treated with Ad/gTRAIL**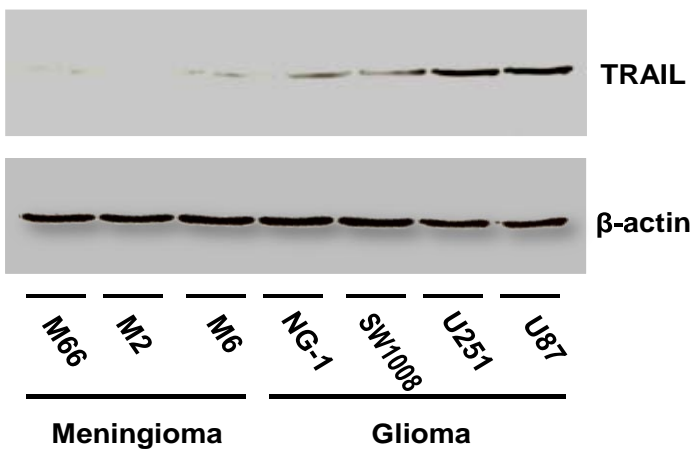

Supplement: MOESM5 [file 9540288]
